# Supplementary material for: Investigation of spatiotemporal evolution and driving mechanisms of carbon sources and sinks in dry-hot valleys under extreme climate events: a case study of the Nu River dry-hot valley
Source: PeerJ journal article supplement (doi:10.7717/peerj.20268), 2025-11-03
Supplement: Supplemental_Files.zip [file Extreme climate indicator station data.xlsx]

## Sheet: Sheet1
date	altitude	lon	lat	hao	station	TXx	TNn	SU25	ID0	PRCPTOT	R10	R25	RX1day	RX5day	SDII	R95p	R99p	WSDI	CSDI	DTR_mean
2001	1503	100.217	23.95	56951099999	LINCANG_CH	30.8889	1.72222	162	0	894.588	31	3	29.718	73.152	4.65931	375.158	105.918	10	11	11.171
2001	2382	100.217	26.8333	56651099999	LIJING_CH	28.3889	-4.88889	24	0	793.496	30	0	22.606	57.912	4.7801	316.23	85.852	7	14	11.369
2001	1649	99.1833	25.1167	56748099999	BAOSHAN_CH	29.6111	0.5	128	0	864.87	32	6	29.718	70.612	4.97052	350.266	114.808	4	16	11.1256
2001	1992	100.183	25.7	56751099999	DALI_CH	29.2778	-1.27778	79	0	739.14	21	1	31.242	59.69	4.27249	335.788	101.092	5	7	11.0976
2001	2589	99.1	30	56247099999	BATANG_CH	35.8889	-8.72222	107	0	381.254	8	0	12.7	40.132	2.68489	170.942	48.26	9	11	16.3002
2001	3320	98.8833	28.45	56444099999	DEQEN_CH	25.1111	-9.61111	1	0	414.274	9	0	13.97	39.37	2.06106	177.8	51.816	7	10	11.0319
2001	3307	97.1667	31.15	56137099999	QAMDO_CH	31.7222	-15.5	26	0	416.306	7	0	12.446	34.29	2.40639	153.67	45.974	6	12	16.2478
2001	1190.9	98.8	27.07	56641	fugong	35.8	1.3	146	0	851.3	24	2	25.5	56.6	4.50423	314.7	97.8	4	14	11.7309
2001	1696.9	98.5	24.9833	56739099999	TENGCHONG_CH	29.2778	-0.388889	82	0	1319.02	53	8	34.29	106.426	6.79908	473.964	131.064	6	19	10.5128
2001	1591.3	98.75	28.05	56533	gongshan	33.6	-1.3	100	0	1045.6	41	0	23.2	62.3	5.17624	309.2	90.3	9	10	10.8828
2002	1503	100.217	23.95	56951099999	LINCANG_CH	30.7778	2.27778	180	0	739.902	26	0	23.114	57.15	4.27689	291.846	82.804	4	8	11.5718
2002	2382	100.217	26.8333	56651099999	LIJING_CH	28.2778	-4.5	26	0	806.45	32	0	24.892	77.978	5.48605	349.758	93.98	7	8	11.5382
2002	1649	99.1833	25.1167	56748099999	BAOSHAN_CH	29.6111	-0.388889	108	0	701.802	19	0	24.892	58.42	4.35902	326.136	95.758	5	7	11.2983
2002	1992	100.183	25.7	56751099999	DALI_CH	28.1111	-1.61111	70	0	764.794	27	3	28.702	77.724	4.69199	329.184	106.426	5	9	11.1598
2002	2589	99.1	30	56247099999	BATANG_CH	35.7222	-9.27778	115	0	329.692	5	0	12.192	38.862	2.84217	146.812	45.974	8	9	16.2596
2002	3320	98.8833	28.45	56444099999	DEQEN_CH	25.5	-8.72222	2	3	642.874	19	0	17.526	58.674	3.26332	242.316	52.578	7	8	10.7425
2002	3307	97.1667	31.15	56137099999	QAMDO_CH	31.1111	-15.8889	53	0	323.596	1	0	11.176	32.766	2.15731	132.334	40.132	6	13	16.3668
2002	1190.9	98.8	27.07	56641	fugong	35.7	1.8	153	0	1249	46	9	32.6	91.8	6.57368	439.6	125.3	4	10	11.5194
2002	1696.9	98.5	24.9833	56739099999	TENGCHONG_CH	29.7778	0.111111	69	0	1008.38	36	2	27.94	94.234	6.00226	375.412	103.886	4	10	10.761
2002	1591.3	98.75	28.05	56533	gongshan	33.5	-0.6	100	0	1465.2	51	11	34.8	87.7	6.84673	455.7	130	7	14	10.8951
2003	1503	100.217	23.95	56951099999	LINCANG_CH	31.7778	2.61111	184	0	527.05	12	0	15.748	59.436	4.11758	205.994	61.976	5	16	11.4692
2003	2382	100.217	26.8333	56651099999	LIJING_CH	30.2222	-4.27778	41	0	610.616	22	1	25.146	55.118	5.21894	301.244	72.898	4	5	11.4064
2003	1649	99.1833	25.1167	56748099999	BAOSHAN_CH	31.2222	-0.611111	135	0	443.738	13	0	17.78	39.116	3.6372	227.584	69.85	6	16	11.7951
2003	1992	100.183	25.7	56751099999	DALI_CH	29.2222	-1.38889	109	0	571.246	17	3	28.702	56.896	5.01093	322.58	107.95	4	9	11.3978
2003	2589	99.1	30	56247099999	BATANG_CH	33.5	-8.27778	119	0	394.97	14	0	15.748	47.752	4.43787	213.106	58.42	5	12	16.2472
2003	3320	98.8833	28.45	56444099999	DEQEN_CH	24	-10.7222	0	1	359.664	2	0	11.684	29.972	2.68406	143.51	31.242	12	12	10.8233
2003	3307	97.1667	31.15	56137099999	QAMDO_CH	30	-14.3889	35	0	330.962	1	0	10.16	30.226	2.73522	117.602	38.354	9	13	16.5449
2003	1190.9	98.8	27.07	56641	fugong	37.5	1	154	0	1040	42	1	26.9	69.9	5.47368	317.2	98.7	7	16	12.0124
2003	1696.9	98.5	24.9833	56739099999	TENGCHONG_CH	30.1111	-0.277778	78	0	931.418	31	1	27.686	57.404	5.57735	330.708	96.52	5	21	10.4775
2003	1591.3	98.75	28.05	56533	gongshan	35	-1.3	97	0	1235.1	43	4	26.8	68.7	5.51384	379.2	104.5	8	12	10.3653
2004	1503	100.217	23.95	56951099999	LINCANG_CH	30.7778	2	179	0	1015.49	32	8	36.576	75.946	6.55156	450.088	102.616	4	7	11.4668
2004	2382	100.217	26.8333	56651099999	LIJING_CH	28.2778	-5.72222	28	0	860.044	37	2	26.162	74.676	6.66701	357.124	98.806	4	4	10.9779
2004	1649	99.1833	25.1167	56748099999	BAOSHAN_CH	29.3889	-0.5	118	0	830.834	35	0	22.606	68.58	6.10907	323.342	64.008	4	6	11.3788
2004	1992	100.183	25.7	56751099999	DALI_CH	28.5	-2.22222	79	0	756.412	19	4	28.702	71.628	5.52126	370.84	109.474	4	7	10.9022
2004	2589	99.1	30	56247099999	BATANG_CH	32.5	-8.77778	124	0	489.458	14	0	15.24	44.196	4.49044	209.55	29.21	4	3	16.1942
2004	3320	98.8833	28.45	56444099999	DEQEN_CH	23.1111	-11.5	0	4	481.33	12	0	17.018	40.894	3.18762	203.708	58.42	8	7	10.917
2004	3307	97.1667	31.15	56137099999	QAMDO_CH	29	-14.7778	31	0	462.28	10	0	12.7	45.212	3.95111	175.514	37.084	5	5	16.1858
2004	1190.9	98.8	27.07	56641	fugong	34.9	1.1	150	0	1261.9	45	9	38.8	101.5	6.09614	465	148.1	3	8	11.3682
2004	1696.9	98.5	24.9833	56739099999	TENGCHONG_CH	28.3889	-1	80	0	1360.42	51	10	33.274	86.614	8.14625	467.106	125.476	4	6	10.6631
2004	1591.3	98.75	28.05	56533	gongshan	33.3	-1.4	100	0	1504.3	57	12	38.1	133.1	6.62687	465.8	136.2	4	5	10.497
2005	1503	100.217	23.95	56951099999	LINCANG_CH	34.3889	3	210	0	669.036	22	0	22.86	65.278	5.14643	261.366	86.868	15	6	11.8124
2005	2382	100.217	26.8333	56651099999	LIJING_CH	30.7778	-4.38889	43	0	485.648	13	0	21.844	52.832	4.22303	250.698	60.96	12	7	10.8547
2005	1649	99.1833	25.1167	56748099999	BAOSHAN_CH	32.3889	0.5	148	0	481.33	15	0	23.114	55.626	4.04479	250.698	77.47	10	8	11.5639
2005	1992	100.183	25.7	56751099999	DALI_CH	31.1111	-2.38889	97	0	609.092	24	0	22.352	60.198	5.29645	293.624	83.312	10	6	10.769
2005	2589	99.1	30	56247099999	BATANG_CH	36.2778	-8.61111	140	0	330.2	2	0	11.176	37.338	4.17975	144.78	41.91	9	10	16.4815
2005	3320	98.8833	28.45	56444099999	DEQEN_CH	25.3889	-11.6111	2	3	325.374	2	0	11.176	32.004	2.48377	141.224	41.402	9	11	11.0922
2005	3307	97.1667	31.15	56137099999	QAMDO_CH	30.2778	-15.2778	46	0	305.054	2	0	10.668	35.814	2.65264	134.366	40.64	11	10	15.9722
2005	1190.9	98.8	27.07	56641	fugong	36.9	1.5	143	0	1184.6	39	12	35	136.7	6.0132	450.1	135.7	4	11	11.3219
2005	1696.9	98.5	24.9833	56739099999	TENGCHONG_CH	30.8889	-0.111111	105	0	949.452	35	1	25.146	88.9	5.86081	352.298	93.218	8	8	10.8983
2005	1591.3	98.75	28.05	56533	gongshan	34.4	-1.1	115	0	1405.5	54	6	33.9	95.9	6.62972	427.5	129.2	5	15	10.6116
2006	1503	100.217	23.95	56951099999	LINCANG_CH	31.7222	2.88889	208	0	861.822	35	4	27.686	104.648	6.43151	373.634	106.172	4	7	12.0845
2006	2382	100.217	26.8333	56651099999	LIJING_CH	29.2778	-1.27778	59	0	559.308	18	0	23.622	64.262	5.08462	283.464	92.456	5	14	11.3396
2006	1649	99.1833	25.1167	56748099999	BAOSHAN_CH	31.3889	0.5	139	0	620.014	22	0	24.384	61.214	5.16678	279.4	88.138	7	8	11.9387
2006	1992	100.183	25.7	56751099999	DALI_CH	29.8889	1.5	112	0	441.198	11	0	17.526	49.022	4.08517	210.058	48.768	6	8	11.3734
2006	2589	99.1	30	56247099999	BATANG_CH	37.8889	-7.11111	137	0	215.138	0	0	9.906	20.828	2.53104	103.632	36.068	7	15	17.0678
2006	3320	98.8833	28.45	56444099999	DEQEN_CH	27.2778	-8.27778	2	0	475.742	7	0	14.732	40.132	3.57701	170.942	54.356	6	8	11.575
2006	3307	97.1667	31.15	56137099999	QAMDO_CH	31	-13.2778	54	0	291.592	4	0	12.192	29.972	2.97543	141.224	44.196	11	12	16.4087
2006	1190.9	98.8	27.07	56641	fugong	37.3	1.5	176	0	833.5	31	3	27.2	67.7	4.57967	307	102.2	5	13	12.3682
2006	1696.9	98.5	24.9833	56739099999	TENGCHONG_CH	31	0.722222	98	0	816.864	32	1	25.908	57.15	5.71234	325.12	89.408	8	9	11.1017
2006	1591.3	98.75	28.05	56533	gongshan	33.3	-0.5	109	0	1176.6	42	1	26.2	75.6	6.03385	339.2	99.2	6	13	11.5243
2007	1503	100.217	23.95	56951099999	LINCANG_CH	32.1111	3.61111	181	0	938.53	35	2	26.924	69.088	6.47262	366.522	75.184	11	5	11.6679
2007	2382	100.217	26.8333	56651099999	LIJING_CH	28.8889	-4.38889	44	0	764.032	29	0	22.86	72.898	5.92273	307.594	83.058	5	6	12.0807
2007	1649	99.1833	25.1167	56748099999	BAOSHAN_CH	30.5	0.222222	128	0	732.282	28	0	23.368	70.612	5.42431	308.61	90.17	9	8	11.3682
2007	1992	100.183	25.7	56751099999	DALI_CH	29.7778	-0.722222	92	0	828.04	31	0	24.892	71.882	6.52	340.614	94.234	11	6	10.6858
2007	2589	99.1	30	56247099999	BATANG_CH	36.3889	-6.77778	138	0	289.56	3	0	12.192	43.942	3.57481	146.05	43.18	11	8	16.1473
2007	3320	98.8833	28.45	56444099999	DEQEN_CH	24.6111	-10.2222	0	1	651.764	21	0	20.828	77.47	4.34509	305.308	80.264	7	8	11.2789
2007	3307	97.1667	31.15	56137099999	QAMDO_CH	30.1111	-14.3889	70	0	237.49	0	0	9.144	24.384	2.86133	125.476	17.78	6	12	17.0432
2007	1190.9	98.8	27.07	56641	fugong	37.3	2.4	171	0	965.2	37	4	29	78.9	5.81446	356.1	110.2	4	8	11.9853
2007	1696.9	98.5	24.9833	56739099999	TENGCHONG_CH	30.7778	0.111111	92	0	1492.76	59	12	30.48	102.616	8.99252	469.392	89.662	5	8	10.5173
2007	1591.3	98.75	28.05	56533	gongshan	33.5	-1	110	0	1353.3	57	5	31.6	80.1	7.01192	349.2	116.7	4	8	11.0719
2008	1503	100.217	23.95	56951099999	LINCANG_CH	32	2.27778	168	0	721.36	21	0	21.082	56.134	5.15257	276.098	80.01	8	11	11.5028
2008	2382	100.217	26.8333	56651099999	LIJING_CH	27.2778	-4.72222	36	0	731.012	24	0	19.812	55.626	5.53797	278.384	76.708	5	7	11.9732
2008	1649	99.1833	25.1167	56748099999	BAOSHAN_CH	29.8889	-0.111111	126	0	605.536	17	0	22.352	56.134	4.88335	273.05	83.312	8	15	11.4577
2008	1992	100.183	25.7	56751099999	DALI_CH	28.7778	1	89	0	819.912	32	3	30.734	86.614	7.19221	383.794	107.95	7	6	10.6505
2008	2589	99.1	30	56247099999	BATANG_CH	33.3889	-6.72222	116	0	296.672	4	0	12.7	28.194	3.15609	132.334	45.974	8	6	16.0177
2008	3320	98.8833	28.45	56444099999	DEQEN_CH	23.2778	-14.7222	0	4	438.15	15	0	16.764	44.704	3.175	214.376	62.738	5	6	11.075
2008	3307	97.1667	31.15	56137099999	QAMDO_CH	30.7222	-17.3889	49	1	329.438	2	0	11.176	23.368	2.86468	147.066	31.496	4	8	15.777
2008	1190.9	98.8	27.07	56641	fugong	36.1	1.8	166	0	803	25	0	22.8	68.4	4.41209	287.2	84.6	5	10	11.8675
2008	1696.9	98.5	24.9833	56739099999	TENGCHONG_CH	28.8889	-0.111111	92	0	980.186	41	6	28.956	89.154	6.7136	369.316	110.744	7	12	10.7436
2008	1591.3	98.75	28.05	56533	gongshan	32.7	-0.8	104	0	1389.5	57	6	32.3	97.4	7.12564	395.3	119.7	7	8	10.983
2009	1503	100.217	23.95	56951099999	LINCANG_CH	32.5	1	225	0	598.932	18	0	21.59	57.15	4.9911	262.89	80.772	5	14	12.346
2009	2382	100.217	26.8333	56651099999	LIJING_CH	29.6111	-5.77778	69	0	577.85	24	0	18.034	55.118	5.89643	251.714	67.31	4	14	12.7775
2009	1649	99.1833	25.1167	56748099999	BAOSHAN_CH	31.3889	-0.888889	151	0	387.35	13	0	19.558	40.132	4.16505	216.408	70.612	5	11	12.6008
2009	1992	100.183	25.7	56751099999	DALI_CH	30.5	-0.277778	117	0	667.512	29	3	27.94	80.264	7.58536	369.316	80.264	5	13	11.5432
2009	2589	99.1	30	56247099999	BATANG_CH	36.3889	-8.11111	158	0	198.12	0	0	9.652	26.162	2.83029	112.014	36.068	7	13	16.6171
2009	3320	98.8833	28.45	56444099999	DEQEN_CH	26.1111	-10.5	1	0	361.188	6	0	11.938	45.212	3.47296	171.45	34.798	7	16	12.0058
2009	3307	97.1667	31.15	56137099999	QAMDO_CH	32.7222	-14.1111	80	0	257.302	4	0	10.668	27.432	2.85891	151.638	41.91	6	10	16.6674
2009	1190.9	98.8	27.07	56641	fugong	38.3	1.1	187	0	608.9	18	0	21.8	44.7	4.00592	258.9	84.4	5	11	12.7061
2009	1696.9	98.5	24.9833	56739099999	TENGCHONG_CH	31	-0.5	104	0	756.666	32	0	24.13	78.232	5.77608	307.594	91.44	6	11	11.3507
2009	1591.3	98.75	28.05	56533	gongshan	34.1	-0.9	129	0	927.7	30	3	28.9	70.9	4.98763	331.1	106.1	5	8	11.661
2010	1503	100.217	23.95	56951099999	LINCANG_CH	32.6111	1.61111	209	0	884.682	30	0	24.892	64.516	5.93746	330.454	91.44	5	13	12.3291
2010	2382	100.217	26.8333	56651099999	LIJING_CH	29.2222	-5.88889	54	0	681.228	26	0	24.892	63.5	5.72461	304.292	89.408	4	7	12.1623
2010	1649	99.1833	25.1167	56748099999	BAOSHAN_CH	29.7222	-0.222222	145	0	861.06	28	7	32.512	73.66	6.78	410.718	123.19	3	13	11.6151
2010	1992	100.183	25.7	56751099999	DALI_CH	30.2778	0.222222	108	0	457.708	12	0	23.368	42.926	4.01498	243.84	85.598	8	5	10.8333
2010	2589	99.1	30	56247099999	BATANG_CH	36.8889	-7.38889	129	0	335.28	4	0	12.192	40.132	2.99357	147.828	47.752	11	7	16.0768
2010	3320	98.8833	28.45	56444099999	DEQEN_CH	24	-9.5	0	0	669.036	19	0	18.034	53.34	4.4307	247.65	66.294	5	8	10.6434
2010	3307	97.1667	31.15	56137099999	QAMDO_CH	32	-14.6111	58	0	422.148	6	0	12.192	35.306	3.17405	160.02	47.244	8	14	15.9594
2010	1190.9	98.8	27.07	56641	fugong	35.6	2	159	0	1404	52	10	38	133.7	7.46809	462.7	149.6	7	13	11.5134
2010	1696.9	98.5	24.9833	56739099999	TENGCHONG_CH	29.5	-0.5	93	0	1474.47	58	14	35.306	121.158	8.77661	517.398	137.922	4	13	10.5733
2010	1591.3	98.75	28.05	56533	gongshan	33.2	-1.6	92	0	1842.8	68	21	38.5	137	8.57116	521.1	149.3	5	8	10.3141
2011	1503	100.217	23.95	56951099999	LINCANG_CH	31.8889	1.27778	190	0	814.07	30	0	22.86	60.198	5.65326	281.686	86.106	5	7	11.7677
2011	2382	100.217	26.8333	56651099999	LIJING_CH	29.1111	-5.88889	54	0	542.544	22	0	20.066	46.736	4.44708	272.288	76.454	6	9	12.6091
2011	1649	99.1833	25.1167	56748099999	BAOSHAN_CH	30.3889	-1	141	0	547.116	16	0	18.288	53.086	4.5593	243.84	70.104	4	9	11.526
2011	1992	100.183	25.7	56751099999	DALI_CH	30.2778	-1.38889	106	0	472.694	14	0	20.828	41.656	4.72694	221.742	76.454	7	11	11.0105
2011	2589	99.1	30	56247099999	BATANG_CH	36.8889	-7.61111	144	0	169.164	0	0	8.382	19.558	3.02079	107.95	23.622	10	8	16.625
2011	3320	98.8833	28.45	56444099999	DEQEN_CH	25.2778	-13.6111	1	1	306.832	3	0	10.922	41.402	2.95031	136.652	42.672	7	6	11.9374
2011	3307	97.1667	31.15	56137099999	QAMDO_CH	31.3889	-14.3889	54	1	272.796	0	0	9.398	23.876	2.5495	120.396	34.036	6	5	16.0578
2011	1190.9	98.8	27.07	56641	fugong	36.6	1.1	173	0	869.9	30	3	27.6	68.3	5.02832	333.1	81.1	4	8	12.3972
2011	1696.9	98.5	24.9833	56739099999	TENGCHONG_CH	30.2222	-0.388889	83	0	896.366	30	0	21.082	79.502	6.09773	322.326	83.312	3	10	10.6518
2011	1591.3	98.75	28.05	56533	gongshan	33.2	-1	119	0	1018.7	34	2	26.6	89.8	5.2241	329.4	99.1	4	8	11.3447
2012	1503	100.217	23.95	56951099999	LINCANG_CH	34	1.22222	205	0	567.182	21	0	19.812	58.928	4.80663	259.842	75.184	18	17	12.6144
2012	2382	100.217	26.8333	56651099999	LIJING_CH	29.6111	-4.88889	59	0	416.052	10	0	17.018	46.228	4.03934	208.28	62.992	9	7	12.0601
2012	1649	99.1833	25.1167	56748099999	BAOSHAN_CH	32.2778	0.111111	132	0	574.548	20	2	27.432	53.34	5.74548	320.802	98.552	11	14	11.8646
2012	1992	100.183	25.7	56751099999	DALI_CH	31.1111	-1	92	0	516.382	17	0	24.638	59.436	4.826	290.322	91.186	8	7	11.1771
2012	2589	99.1	30	56247099999	BATANG_CH	35.3889	-9.61111	125	0	234.95	0	0	9.906	28.194	2.83072	110.998	37.338	7	6	16.1501
2012	3320	98.8833	28.45	56444099999	DEQEN_CH	25	-12.3889	1	2	480.568	13	0	13.97	30.734	3.36062	194.31	40.64	5	8	10.9752
2012	3307	97.1667	31.15	56137099999	QAMDO_CH	29.7222	-15.8889	43	0	392.43	7	0	11.176	33.528	3.41243	161.036	44.196	9	6	15.5877
2012	1190.9	98.8	27.07	56641	fugong	38.6	1.1	172	0	1026.4	35	2	27.3	78.3	5.67072	353.1	98.7	6	12	11.9163
2012	1696.9	98.5	24.9833	56739099999	TENGCHONG_CH	31.3889	-0.388889	89	0	947.166	33	3	27.432	73.914	6.86352	390.398	105.664	7	21	11.1626
2012	1591.3	98.75	28.05	56533	gongshan	34.8	-1.5	97	0	1472.6	59	6	30	95.4	7.14854	382	114.5	5	10	10.5793
2013	1503	100.217	23.95	56951099999	LINCANG_CH	31.7222	-0.388889	191	0	773.938	28	0	24.384	57.912	5.5679	324.358	89.662	8	11	12.3913
2013	2382	100.217	26.8333	56651099999	LIJING_CH	28.7778	-6.72222	45	0	602.488	21	0	20.574	54.864	5.68385	283.464	78.74	6	10	12.1742
2013	1649	99.1833	25.1167	56748099999	BAOSHAN_CH	32.1111	-0.777778	145	0	596.392	19	0	19.304	71.374	4.73327	256.286	75.184	14	14	11.7912
2013	1992	100.183	25.7	56751099999	DALI_CH	31.3889	-4.27778	85	0	498.602	14	0	19.558	51.562	5.03638	237.744	69.85	9	9	11.9324
2013	2589	99.1	30	56247099999	BATANG_CH	36.6111	-9.5	123	0	273.812	3	0	10.922	36.068	3.14726	146.812	31.242	8	11	15.9898
2013	3320	98.8833	28.45	56444099999	DEQEN_CH	25.6111	-12.5	2	3	440.944	12	0	13.97	37.846	3.36598	194.818	50.8	8	10	11.5607
2013	3307	97.1667	31.15	56137099999	QAMDO_CH	31.2778	-16.1111	39	1	366.268	9	0	14.478	39.37	3.48827	185.928	53.086	9	8	15.5654
2013	1190.9	98.8	27.07	56641	fugong	40.3	1	169	0	687.7	24	0	21.9	52	4.35253	241.7	81.6	10	6	13.2184
2013	1696.9	98.5	24.9833	56739099999	TENGCHONG_CH	30.1111	-1.88889	78	0	1075.44	42	2	25.908	72.644	7.366	336.042	100.584	7	12	10.8263
2013	1591.3	98.75	28.05	56533	gongshan	36.9	-3	122	0	1097.3	35	7	32.9	70.1	6.06243	405.3	124.7	8	11	11.8666
2014	1503	100.217	23.95	56951099999	LINCANG_CH	34.2778	2.38889	232	0	589.534	23	0	22.098	69.342	5.6686	291.846	83.058	16	14	12.8391
2014	2382	100.217	26.8333	56651099999	LIJING_CH	32	-5	60	0	546.1	17	0	23.876	57.404	5.30194	282.448	91.44	14	7	12.2529
2014	1649	99.1833	25.1167	56748099999	BAOSHAN_CH	31.2222	0.5	156	0	517.652	18	0	17.78	54.356	4.83787	244.856	68.326	9	14	11.7203
2014	1992	100.183	25.7	56751099999	DALI_CH	31.6111	-0.5	115	0	435.356	14	0	19.05	65.532	4.48821	261.112	73.66	15	7	11.9856
2014	2589	99.1	30	56247099999	BATANG_CH	36.6111	-6.5	131	0	326.644	10	0	13.208	46.99	3.98346	189.23	51.562	14	7	16.1367
2014	3320	98.8833	28.45	56444099999	DEQEN_CH	25.6111	-12.2778	1	0	304.546	7	0	12.7	35.052	3.27469	167.894	48.26	7	10	11.8846
2014	3307	97.1667	31.15	56137099999	QAMDO_CH	29.6111	-14.1111	36	0	272.034	0	0	9.398	28.702	2.49572	121.158	35.052	8	5	15.5119
2014	1190.9	98.8	27.07	56641	fugong	35.6	2	174	0	679.5	22	0	23.5	60.3	4.5604	266.1	84.1	4	10	12.9042
2014	1696.9	98.5	24.9833	56739099999	TENGCHONG_CH	29.2778	-0.722222	93	0	1013.21	37	3	27.686	75.692	6.75471	395.986	78.486	7	14	11.531
2014	1591.3	98.75	28.05	56533	gongshan	33.7	-0.8	126	0	1006.8	39	1	26	82.9	5.53187	322.4	96.7	3	7	11.4739
2015	1503	100.217	23.95	56951099999	LINCANG_CH	32.7778	1	158	0	957.072	38	3	26.162	83.82	6.64633	381.508	77.978	5	11	11.0837
2015	2382	100.217	26.8333	56651099999	LIJING_CH	30.7222	-4.11111	59	0	606.806	21	2	28.448	71.374	5.14242	301.752	99.822	10	7	11.1508
2015	1649	99.1833	25.1167	56748099999	BAOSHAN_CH	31.3889	0.611111	137	0	565.658	22	0	22.098	80.264	4.96191	264.414	85.09	6	10	10.7413
2015	1992	100.183	25.7	56751099999	DALI_CH	32.2778	-1.72222	110	0	670.814	21	2	30.48	60.706	5.00607	329.438	104.648	9	6	11.4279
2015	2589	99.1	30	56247099999	BATANG_CH	36.2222	-8.27778	114	0	308.102	5	0	12.192	30.226	3.5414	158.496	34.036	7	7	15.5326
2015	3320	98.8833	28.45	56444099999	DEQEN_CH	26.1111	-12.2778	1	2	304.038	3	0	12.446	35.56	2.35688	149.352	44.958	7	13	11.45
2015	3307	97.1667	31.15	56137099999	QAMDO_CH	31.5	-15.6111	31	0	367.03	2	0	13.208	32.258	3.00844	135.89	44.704	7	9	15.572
2015	1190.9	98.8	27.07	56641	fugong	36.8	2	164	0	864.6	34	0	20.9	57.1	4.99769	282.3	81.4	4	8	11.4132
2015	1696.9	98.5	24.9833	56739099999	TENGCHONG_CH	28.7778	-0.222222	43	0	1150.87	42	10	31.75	83.058	7.3774	464.312	123.698	3	10	10.0525
2015	1591.3	98.75	28.05	56533	gongshan	35	-1.4	106	0	1021	30	0	24.7	69.3	5.0796	311	94.2	3	8	11.1948
2016	1503	100.217	23.95	56951099999	LINCANG_CH	31.7222	1.5	145	0	1172.46	42	2	25.4	73.914	6.33764	385.826	50.546	7	16	10.2516
2016	2382	100.217	26.8333	56651099999	LIJING_CH	28.7778	-5.5	30	0	685.546	22	0	21.336	54.864	4.60098	300.482	80.772	6	8	10.7856
2016	1649	99.1833	25.1167	56748099999	BAOSHAN_CH	31	1.22222	141	0	613.41	18	0	22.86	49.276	4.51037	257.556	83.566	5	19	10.2617
2016	1992	100.183	25.7	56751099999	DALI_CH	30.5	-1.22222	101	0	759.714	27	4	29.464	80.01	4.96545	350.774	111.76	4	7	11.1577
2016	2589	99.1	30	56247099999	BATANG_CH	33.7222	-7.11111	87	0	443.738	10	0	14.478	50.038	4.43738	192.532	56.896	11	8	14.4467
2016	3320	98.8833	28.45	56444099999	DEQEN_CH	26.6111	-10	2	3	593.344	20	0	17.018	47.244	3.55296	239.522	50.8	14	10	10.1786
2016	3307	97.1667	31.15	56137099999	QAMDO_CH	31.2778	-14.2778	29	2	358.902	3	0	10.922	40.894	2.9179	142.24	41.402	20	8	15.3914
2016	1190.9	98.8	27.07	56641	fugong	36.6	2.3	157	0	1398.6	51	18	40.4	119.3	7.8573	564.7	153.9	9	10	10.404
2016	1696.9	98.5	24.9833	56739099999	TENGCHONG_CH	28.5	-1.11111	60	0	1227.84	49	9	32.258	112.014	7.62631	469.392	121.158	4	18	9.68325
2016	1591.3	98.75	28.05	56533	gongshan	34.5	-1	113	0	1593.7	59	17	35.4	143	7.85074	546.8	138.8	13	9	10.3125
2017	1503	100.217	23.95	56951099999	LINCANG_CH	31	1.77778	150	0	988.568	35	1	26.924	70.104	6.29661	346.456	98.044	7	12	10.8734
2017	2382	100.217	26.8333	56651099999	LIJING_CH	28.1111	-4	42	0	676.402	19	0	20.574	60.198	4.8662	277.876	79.756	6	7	11.2956
2017	1649	99.1833	25.1167	56748099999	BAOSHAN_CH	31.3889	2.27778	133	0	775.97	32	0	22.098	65.024	5.42636	325.374	66.294	6	12	10.4745
2017	1992	100.183	25.7	56751099999	DALI_CH	31.2778	-1	107	0	581.152	18	0	23.622	40.894	4.30483	291.846	87.122	12	5	11.8715
2017	2589	99.1	30	56247099999	BATANG_CH	34.1111	-5.38889	121	0	276.098	2	0	10.922	32.258	2.78887	125.476	38.608	11	6	15.0066
2017	3320	98.8833	28.45	56444099999	DEQEN_CH	23.8889	-10	0	0	497.586	12	0	13.208	37.592	3.23108	190.5	49.53	5	7	10.0623
2017	3307	97.1667	31.15	56137099999	QAMDO_CH	30.1111	-13.2778	39	0	342.646	5	0	11.684	42.672	2.83179	162.306	46.736	7	12	15.8821
2017	1190.9	98.8	27.07	56641	fugong	34.9	1.1	172	0	960	35	4	32.5	66.7	5.78313	393.8	114.9	4	21	11.2974
2017	1696.9	98.5	24.9833	56739099999	TENGCHONG_CH	29.7222	-0.5	54	0	1184.4	40	3	27.178	73.152	6.58001	380.238	103.886	6	13	9.92487
2017	1591.3	98.75	28.05	56533	gongshan	33.5	-1.4	113	0	1515.2	51	15	36.1	123.1	7.81031	528.8	137.3	5	16	10.9508
2018	1503	100.217	23.95	56951099999	LINCANG_CH	31.5	2.22222	149	0	925.576	34	0	24.384	79.502	6.17051	370.332	96.012	5	13	11.0812
2018	2382	100.217	26.8333	56651099999	LIJING_CH	28.2778	-5.38889	23	0	858.774	38	0	23.114	86.36	6.55553	329.184	87.63	8	8	11.3133
2018	1649	99.1833	25.1167	56748099999	BAOSHAN_CH	31.1111	1.88889	130	0	584.2	22	0	24.638	52.07	4.6	281.94	81.788	5	13	10.5484
2018	1992	100.183	25.7	56751099999	DALI_CH	30.2778	-1.72222	91	0	584.708	19	0	21.844	59.944	4.67766	293.878	60.706	6	5	11.8784
2018	2589	99.1	30	56247099999	BATANG_CH	35	-7.77778	116	0	360.172	6	0	10.922	35.052	3.18736	155.194	43.18	9	8	14.6326
2018	3320	98.8833	28.45	56444099999	DEQEN_CH	23.2778	-11.2778	0	1	467.36	8	0	12.7	33.02	2.95797	178.308	49.784	8	9	10.0154
2018	3307	97.1667	31.15	56137099999	QAMDO_CH	30.5	-15.5	39	1	579.374	17	1	25.654	59.944	4.22901	234.696	74.93	9	5	14.7011
2018	1190.9	98.8	27.07	56641	fugong	35.4	-5.2	178	0	851	29	0	23.5	66.1	5.06548	330	91	7	7	11.2963
2018	1696.9	98.5	24.9833	56739099999	TENGCHONG_CH	29.7222	-0.777778	39	0	1156.21	44	6	32.004	111.506	7.27175	443.23	123.952	5	14	9.93939
2018	1591.3	98.75	28.05	56533	gongshan	33.9	-1.2	108	0	1301.3	54	1	26.6	81.2	6.3478	390.6	75.1	6	7	10.1542
2019	1503	100.217	23.95	56951099999	LINCANG_CH	33.1111	1.61111	194	0	456.692	13	0	18.034	49.022	3.77431	216.916	64.77	9	17	12.1032
2019	2382	100.217	26.8333	56651099999	LIJING_CH	31.2222	-4.88889	57	0	598.932	20	0	24.13	70.866	5.44484	283.21	68.326	5	8	11.6785
2019	1649	99.1833	25.1167	56748099999	BAOSHAN_CH	31.7222	1.72222	156	0	592.074	19	0	22.86	54.864	5.19363	295.91	88.392	5	10	11.0724
2019	1992	100.183	25.7	56751099999	DALI_CH	31.1111	-1.72222	116	0	480.822	13	0	17.78	34.544	4.29305	234.696	69.596	5	10	12.3495
2019	2589	99.1	30	56247099999	BATANG_CH	35.2222	-8.11111	115	0	294.386	2	0	11.684	26.416	3.23501	135.636	40.132	21	9	15.3002
2019	3320	98.8833	28.45	56444099999	DEQEN_CH	25.2222	-11.3889	1	2	391.922	3	0	12.954	30.226	2.64812	144.018	36.322	5	7	10.6489
2019	3307	97.1667	31.15	56137099999	QAMDO_CH	30.6111	-15.8889	47	0	405.638	3	0	12.192	37.846	2.98263	138.176	33.782	14	7	15.2051
2019	1190.9	98.8	27.07	56641	fugong	37	1.7	170	0	860.2	32	4	26.9	77.1	5.89178	361.4	103.5	3	10	10.9647
2019	1696.9	98.5	24.9833	56739099999	TENGCHONG_CH	29.6111	0.222222	68	0	965.2	36	1	25.908	99.822	6.14777	373.888	99.822	4	9	10.7375
2019	1591.3	98.75	28.05	56533	gongshan	34.7	-1.2	123	0	980.8	35	0	23.8	66.5	5.00408	307.9	83.6	8	11	10.2813
2020	1503	100.217	23.95	56951099999	LINCANG_CH	31.7778	0.222222	197	0	788.416	29	2	25.654	85.598	6.25727	357.886	100.33	9	7	13.2634
2020	2382	100.217	26.8333	56651099999	LIJING_CH	30.2778	-5.72222	100	0	533.654	20	0	21.082	45.974	4.8514	259.842	82.55	7	13	13.341
2020	1649	99.1833	25.1167	56748099999	BAOSHAN_CH	31.8889	1.22222	180	0	534.924	20	1	25.4	61.976	4.90756	298.196	94.996	6	8	11.2024
2020	1992	100.183	25.7	56751099999	DALI_CH	30.7778	-2.77778	145	0	759.206	26	10	36.576	85.852	6.96519	464.82	133.858	7	7	12.8139
2020	2589	99.1	30	56247099999	BATANG_CH	35.2778	-9.27778	175	0	269.24	3	0	11.176	34.798	3.84629	138.684	41.656	18	16	17.3788
2020	3320	98.8833	28.45	56444099999	DEQEN_CH	26.5	-13.2778	2	0	365.506	7	0	13.716	34.544	2.79012	175.514	50.546	7	16	12.303
2020	3307	97.1667	31.15	56137099999	QAMDO_CH	31.2778	-16.1111	84	0	306.324	0	0	9.398	37.846	2.86284	136.906	28.194	10	13	18.0412
2020	1696.9	98.5	24.9833	56739099999	TENGCHONG_CH	30.1111	-1.5	108	0	1065.78	37	6	28.194	99.06	6.74547	389.382	108.712	4	15	11.7633
2021	1503	100.217	23.95	56951099999	LINCANG_CH	33	2.27778	215	0	874.522	30	4	28.194	76.2	6.67574	381.508	106.426	8	8	12.9811
2021	2382	100.217	26.8333	56651099999	LIJING_CH	32	-4.61111	98	0	618.49	22	5	31.496	94.742	7.27635	392.938	121.666	5	13	13.3883
2021	1649	99.1833	25.1167	56748099999	BAOSHAN_CH	32.2778	0	190	0	528.32	24	0	23.114	65.278	6.07264	289.052	90.678	10	14	13.3706
2021	1992	100.183	25.7	56751099999	DALI_CH	31.3889	-1.27778	152	0	316.992	11	0	17.272	44.958	3.86576	199.644	59.182	8	10	13.3411
2021	2589	99.1	30	56247099999	BATANG_CH	36.3889	-6	164	0	293.116	8	0	12.954	37.084	3.90821	174.244	38.1	10	10	17.1848
2021	3320	98.8833	28.45	56444099999	DEQEN_CH	26	-9.22222	5	0	281.178	6	0	11.938	34.798	3.1593	164.338	23.114	10	8	12.8081
2021	3307	97.1667	31.15	56137099999	QAMDO_CH	31.6111	-14.8889	76	0	266.7	3	0	10.414	31.242	2.46944	132.842	40.64	10	11	18.0399
2021	1696.9	98.5	24.9833	56739099999	TENGCHONG_CH	30.5	0.722222	161	0	739.648	26	0	21.844	65.278	5.35977	268.478	76.2	5	10	12.504
2022	1503	100.217	23.95	56951099999	LINCANG_CH	30.6111	1.72222	207	0	713.994	25	0	21.082	53.848	4.75996	296.672	78.74	7	5	13.1553
2022	2382	100.217	26.8333	56651099999	LIJING_CH	29.7222	-4.61111	80	0	536.702	17	0	21.082	71.374	4.87911	264.922	79.248	6	6	13.0915
2022	1649	99.1833	25.1167	56748099999	BAOSHAN_CH	31.1111	-1.38889	174	0	578.358	20	0	17.78	47.752	4.554	264.668	70.358	8	8	13.1241
2022	1992	100.183	25.7	56751099999	DALI_CH	30.3889	-2	138	0	516.128	14	0	18.796	46.482	4.26552	235.966	70.612	9	6	12.9872
2022	2589	99.1	30	56247099999	BATANG_CH	35.7222	-8.27778	148	0	336.55	12	0	14.986	50.292	4.94926	198.12	57.912	6	8	17.0496
2022	3320	98.8833	28.45	56444099999	DEQEN_CH	25.5	-14.7222	8	1	452.628	11	0	16.764	53.34	3.83583	205.994	64.262	13	14	12.6061
2022	3307	97.1667	31.15	56137099999	QAMDO_CH	33.1111	-16.5	85	0	352.806	8	0	11.684	35.306	3.15005	179.832	46.736	13	8	17.9205
2022	1696.9	98.5	24.9833	56739099999	TENGCHONG_CH	29.8889	-0.722222	135	0	1112.27	44	0	24.892	79.502	6.95166	352.298	97.282	7	10	12.1191
2023	1503	100.217	23.95	56951099999	LINCANG_CH	34.8889	2.11111	212	0	629.412	26	0	23.622	62.992	5.334	294.132	89.154	11	23	13.4756
2023	2382	100.217	26.8333	56651099999	LIJING_CH	32.2778	-4.88889	95	0	320.548	11	0	15.494	45.974	4.39107	163.83	57.15	12	12	13.709
2023	1649	99.1833	25.1167	56748099999	BAOSHAN_CH	32.7222	-0.5	163	0	579.628	22	4	30.226	54.356	6.90033	359.41	113.284	11	22	13.8054
2023	1992	100.183	25.7	56751099999	DALI_CH	32.3889	-0.277778	134	0	584.708	25	1	31.242	71.882	7.90146	320.04	101.6	11	13	13.6314
2023	2589	99.1	30	56247099999	BATANG_CH	36.3889	-7.22222	103	0	142.494	0	0	9.906	22.352	2.90804	78.994	27.178	9	13	17.0639
2023	3320	98.8833	28.45	56444099999	DEQEN_CH	24.3889	-9.38889	0	0	320.548	5	0	13.716	38.1	2.99578	162.814	52.578	6	8	12.9066
2023	3307	97.1667	31.15	56137099999	QAMDO_CH	30.3889	-15.2778	71	0	225.552	0	0	9.906	30.48	2.92925	123.444	28.956	10	13	18.0304
2023	1696.9	98.5	24.9833	56739099999	TENGCHONG_CH	30.7222	0.222222	134	0	849.884	36	4	29.718	81.28	7.94284	351.536	112.268	6	18	12.6519
2024	1503	100.217	23.95	56951099999	LINCANG_CH	32.7222	2.5	175	0	626.618	25	0	24.892	68.326	6.96242	261.112	48.006	10	15	13.2911
2024	2382	100.217	26.8333	56651099999	LIJING_CH	29.3889	-3.77778	82	0	383.032	13	0	20.066	66.294	5.98487	174.752	58.42	4	7	12.6717
2024	1649	99.1833	25.1167	56748099999	BAOSHAN_CH	31.2222	0	135	0	354.076	10	0	22.606	55.372	4.78481	181.864	65.532	5	10	12.9551
2024	1992	100.183	25.7	56751099999	DALI_CH	31.2222	-0.611111	115	0	428.498	12	6	34.29	68.58	6.39549	266.954	97.028	5	10	12.8279
2024	2589	99.1	30	56247099999	BATANG_CH	34.8889	-6.11111	97	0	154.94	4	0	12.192	34.29	3.2966	91.186	23.368	5	9	16.2195
2024	3320	98.8833	28.45	56444099999	DEQEN_CH	25.2222	-10.2222	2	0	344.678	9	0	15.24	37.846	3.82976	136.906	43.942	10	8	12.0519
2024	3307	97.1667	31.15	56137099999	QAMDO_CH	31.7222	-14.7222	68	0	162.052	2	0	10.668	27.94	2.49311	82.042	21.082	13	10	17.2553
2024	1696.9	98.5	24.9833	56739099999	TENGCHONG_CH	30.7222	0.5	111	0	532.638	15	3	31.496	74.93	5.85316	258.826	86.614	5	10	12.115
