# Supplementary material for: Investigation of spatiotemporal evolution and driving mechanisms of carbon sources and sinks in dry-hot valleys under extreme climate events: a case study of the Nu River dry-hot valley
Source: PeerJ journal article supplement (doi:10.7717/peerj.20268), 2025-11-03
Supplement: Supplemental_Files.zip [file NPP annual total data.xlsx]

## Sheet: Sheet1
id	year	total NPP
1	2001	7.40007e+07
2	2002	7.61675e+07
3	2003	7.47527e+07
4	2004	7.2287e+07
5	2005	7.58531e+07
6	2006	7.73557e+07
7	2007	7.78332e+07
8	2008	8.03382e+07
9	2009	7.69181e+07
10	2010	7.28184e+07
11	2011	7.9287e+07
12	2012	7.38635e+07
13	2013	7.69501e+07
14	2014	7.68642e+07
15	2015	7.39237e+07
16	2016	7.77347e+07
17	2017	8.10037e+07
18	2018	7.2592e+07
19	2019	7.84693e+07
20	2020	7.77898e+07
21	2021	7.91974e+07
22	2022	8.12366e+07
23	2023	8.08969e+07
24	2024	8.40006e+07
		7.71723e+07
